# Supplementary material for: Spatiotemporal visualization of SnRK1 activity unveils its multifaceted role during plant growth and development
Source: Research Square preprint supplement (doi:10.21203/rs.3.rs-5290460/v1), 2024-11-21
Supplement: Supplementary file 1 [file 5080e20a0fdba46396bcce55.xlsx]

## Sheet: Supplementary Data 2a
Supplementary Data 2a: Primers that were used in this study
Primer	DNA sequence
KIN10_1_fwd	TTTTGAAGACATATTGCAGGCACAGGCAGTAGAAGTGTTTTAGAGCTAGAAATAGC
KIN10_2_fwd	TTTTGAAGACATATTGTCTCTATAACCTCATAGAGAGTTTTAGAGCTAGAAATAGC
KIN10_KD_fwd	TTTTGAAGACATATTGCTGAGCAACATAATGCGAGAGTTTTAGAGCTAGAAATAGC
KIN11_1_fwd	TTTTGAAGACATATTGTAGCAGAGCATGTTGTCACAGTTTTAGAGCTAGAAATAGC
KIN11_2_fwd	TTTTGAAGACATATTGTCATACTGCCGAATAATATGGTTTTAGAGCTAGAAATAGC
KIN11_KD_fwd	TTTTGAAGACATATTGAGAATTTACTATTGGATTCGGTTTTAGAGCTAGAAATAGC
KIN10_1_rev	TTTTGAAGACTTAAACTTGGTAGGGTGAAGATAGCTCAATCACTACTTCGACTC
KIN10_2_rev	TTTTGAAGACTTAAACCCTGCAATCTACCCTTCTCACAATCACTACTTCGACTC
KIN10_KD_rev	TTTTGAAGACTTAAACCAACTTGTCTTCAAAAAATGCAATCACTACTTCGACTC
KIN11_1_rev	TTTTGAAGACTTAAACTAATCGTCGTAAGATCAAGACAATCACTACTTCGACTC
KIN11_2_rev	TTTTGAAGACTTAAACCGAGTGACATTTATGTTGTGCAATCACTACTTCGACTC
KIN11_KD_rev	TTTTGAAGACTTAAACGCATAACATTACTCAACCCACAATCACTACTTCGACTC
G7TF	CGCACTCAGTCTTTCATCTACGG
2x_gRNA_REV	TCTAGTGTTGTTGTTGTGGTTC
CEL5-qPCR-F	GGAGGACCGAATCAAAACGA
CEL5-qPCR-R	AAATACGCCAATGGTCCGAC
NLP7-qPCR-F	AGCATTACCGGACAAGAAGG
NLP7-qPCR-R	GCTGAGGAATCAACATCGTC
BRN1-qPCR-F	ACAAGAAGATCGGCATGAGGAAGAC
BRN1-qPCR-R	TTCCTTGGTAAGGGCTTTCTCTTCG
SMB-qPCR-F	TGCAGCACCTTCATGTTTCTCTTGG
SMB-qPCR-R	CACCGTGGATGACGACCCTATCTC
BRN2-qPCR-F	CCTCAAGCCAACCCTAGTGAAGATG
BRN2-qPCR-R	TCATGGTTGTGTTGGTCCAATGAGT
ACT2-qPCR-F	GGAACTGGAATGGTGAAGGCTG
ACT2-qPCR-R	CGATTGGATACTTCAGAGTGAGGA
XTH5_qPCRF1	TTCGAGTCTGTGGAATGCAG
XTH5_qPCRR1	CGTGGAAGCCTCTGTAGGAC
PL-qPCR-F	GAGAGGGTCCGGTTCTTAGGAGCTA
PL-qPCR-R	GCCGATGTTCCCATGATTCCAC

## Sheet: Supplementary Data 2b
Supplementary Data2b: Plasmids that were used in this study
Vector_ID	Plasmid name
9_62	PGG_A-AtU6-26-BbsI-ccdB-BbsI-B
9_63	PGG_B-AtU6-26-BbsI-ccdB-BbsI-C
9_64	PGG_C-AtU6-26-BbsI-ccdB-BbsI-D
9_65	PGG_D-AtU6-26-BbsI-ccdB-BbsI-E
9_66	PGG_E-AtU6-26-BbsI-ccdB-BbsI-F
9_67	PGG_F-AtU6-26-BbsI-ccdB-BbsI-G
9_14	PGG_pEN-2xAtU6_template
23_03	pGG-A-AtU6-gRNA-SnRK1α1-1-B
23_04	PGG-B-AtU6-gRNA-SnRK1α1-2-C
23_05	PGG-C-Atu6-gRNA-SnRK1α1-KD-D
23_06	PGG-D-AtU6-gRNA-SnRK1α2-1-E
23_07	PGG-E-AtU6-gRNASnRK1α2-2-F
23_08	PGGF-AtU6-gRNA-SnRK1α2-KD-G
10_07	pFASTR-pSMB:Cas9-P2A-mTagBFP2nls-G7t-A-BsaI-ccdB-BsaI-G
23_09	pFASTR-pSMB-Cas9-P2A-mTagBFP2-NLS-G7t-gRNA-SnRK1α1
23_10	pFASTR-pSMB-Cas9-P2A-mTagBFP2-NLS-G7t-gRNA-SnRK1α2
23_11	pFASTR-pSMB:Cas9-P2A-mTagBFP2nls-G7t-gRNA SnRK1α1+SnRK1α2
10_32	pGGA-pTMM-B
23_12	pGG-A-pWOX5-B
7_09	PGGB-linker-C
23_13	pGG-C-Cas9-N7-D
10_37	PGGD-P2A-TagBFP-NLS-E
6_70	PGG-E-G7t-F
11_14	pGG-F-A-AarI-SacB-AarI-G-G
9_48	pFASTRK-AG
23_14	pFASTRK-pTMM-AtCas9-N7-G7t-AarI-A-SacB-G-AarI
23_15	pFASTRK-pWOX5-AtCas9-N7-G7t-AarI-A-SacB-G-AarI
23_16	pFASTRK-pTMM-AtCas9-N7-G7t-gRNA-SnRK1α1+SnRK1α2
23_17	pFASTRK-pWOX5-AtCas9-N7-G7t-gRNA-SnRK1α1+SnRK1α2
23_18	pFASTRK-pRPS5a-XVE-Cas9-N7-T2A-TagBFP2-NLS-G7t-A-AarI-SacB-AarI-G
23_19	pFASTRK-pRPS5a-XVE-Cas9-T2A-mTagBFP2-NLS-G7t-gRNA-SnRK1α1+SnRK1α2
