# Supplementary material for: Spatiotemporal visualization of SnRK1 activity unveils its multifaceted role during plant growth and development
Source: Research Square preprint supplement (doi:10.21203/rs.3.rs-5290460/v1), 2024-11-21
Supplement: Supplementary file 2 [file 6a7b574f8c1650ec855fcde4.xlsx]

## Sheet: Supplementary Data 1
Supplementary Data 1: Sequence of gRNAs targeting the catalytic subunits SnRK1α1 and SnRK1α2
Gene	exon	gRNA	Protospacer	PAM
SnRK1α1	2	1	CAGGCACAGGCAGTAGAAGT	TGG
SnRK1α1	2	2	AGCTATCTTCACCCTACCAA	AGG
SnRK1α1	3	1	TCTCTATAACCTCATAGAGA	CGG
SnRK1α1	3	2	TGAGAAGGGTAGATTGCAGG	AGG
SnRK1α1	4 (KD)	1	CTGAGCAACATAATGCGAGA	TGG
SnRK1α1	4 (KD)	2	CATTTTTTGAAGACAAGTTG	TGG
SnRK1α2	1	1	TAGCAGAGCATGTTGTCACA	GGG
SnRK1α2	1	2	TCTTGATCTTACGACGATTA	AGG
SnRK1α2	2	1	TCATACTGCCGAATAATATG	AGG
SnRK1α2	2	2	CACAACATAAATGTCACTCG	TGG
SnRK1α2	3 (KD)	1	AGAATTTACTATTGGATTCG	AGG
SnRK1α2	3 (KD)	2	TGGGTTGAGTAATGTTATGC	GGG
